# Supplementary material for: Effect of Molybdenum and Vanadium Substitution in Langbeinite Phosphates: Structural and Thermal Expansion Investigation of KPbCr2P3-xMxO12 (M = V, Mo and x = 0.1, 0.2)
Source: Research Square preprint supplement (doi:10.21203/rs.3.rs-8335763/v1), 2025-12-22
Supplement: Supplementary file 1 [file 5c4362bac149bf2c1b37448d.docx]

**Effect of Molybdenum and Vanadium Substitution in Langbeinite Phosphates: Structural and Thermal Expansion Investigation of** **KPbCr2P3-xMxO12 (M = V, Mo and x = 0.1, 0.2)**

Daneshwaran Balaji1, Triveni Rajashekhar Mandlimath2, and Sathasivam Pratheep Kumar2*

1 The Water Research Center, The Hydro-Chemistry Laboratory, Geophysics and Earth Sciences, Raymond and Beverly Sackler Faculty of Exact Sciences, Tel Aviv

University, Tel Aviv, 69978, Israel.

2 Department of Chemistry, School of Advanced Sciences, VIT-AP University, Inavolu, Beside AP Secretariat, Amaravati 522241, Andhra Pradesh, India.

ORCID: 0000-0002-8929-74821,

**
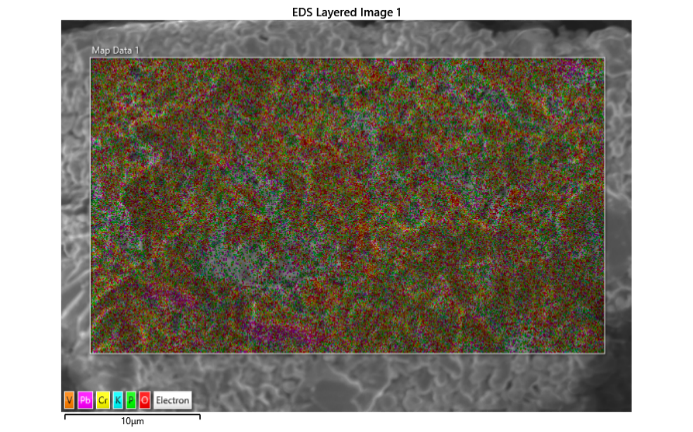
(a) V01: KPbCr2P2.9V0.1O12**

**(b) M01: KPbCr2[P2.9Mo0.1]+0.1O12**

**
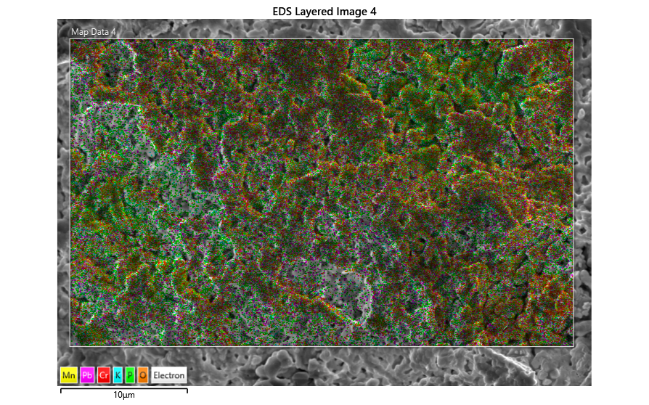
**

Fig. S1: SEM mappings of (a) V01, (b) M01.
